# Supplementary material for: QUINTUS AURELIUS SYMMACHUS: A POLITICAL AND SOCIAL BIOGRAPHY.
Source: Royal Society of Chemistry journal article supplement (doi:10.1039/d3cp04115h), 1974-01-01
Supplement: d3cp04115h1.pdf [file d3cp04115h1.pdf]

## Quantifying rigidity for thermally stable Cr<sup>3+</sup> phosphors

Shaojian Xu,<sup>a</sup> Jiahao Feng,<sup>a</sup> Daidi Zhang,<sup>a</sup> Biqian Zhang,<sup>a</sup> Dawei Wen,<sup>\*a</sup> Mingmei Wu<sup>\*b</sup>, Junhao Li<sup>c</sup>

a. School of Applied Physics and Materials, Wuyi University, Jiangmen, 529020, PR China. E-mail: ontaii@163.com

b. School of Chemical Engineering and Technology, Sun Yat-Sen University, Zhuhai, 519082 P. R. China. E-mail: ceswmm@mail.sysu.edu.cn

c. Guangdong Provincial Key Laboratory of Rare Earth Development and Application, Institute of Resources Utilization and Rare Earth Development, Guangdong Academy of Sciences, Guangzhou, 510651, PR China

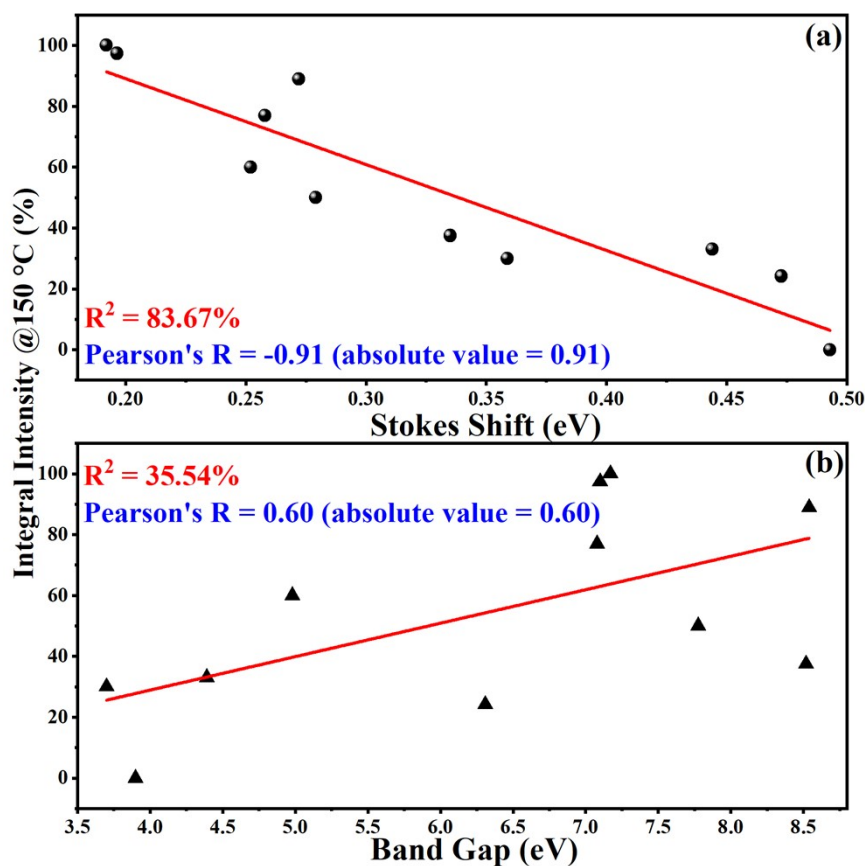

**Figure S1.** Correlation analysis of (a) Stokes shift vs thermal stability and (b) band gap vs thermal stability for Cr<sup>3+</sup>-doped phosphors (SrAl<sub>12</sub>O<sub>19</sub>, Ca<sub>3</sub>Sc<sub>2</sub>Si<sub>3</sub>O<sub>12</sub>, CaMgSi<sub>2</sub>O<sub>6</sub>, KAlP<sub>2</sub>O<sub>7</sub>, GaTaO<sub>4</sub>, ScBO<sub>3</sub>, Mg<sub>2</sub>B<sub>2</sub>O<sub>5</sub>, Mg<sub>2</sub>Ge<sub>2</sub>O<sub>6</sub>, Mg<sub>4</sub>Ta<sub>2</sub>O<sub>9</sub>, LaSc<sub>3</sub>(BO<sub>3</sub>)<sub>4</sub> and LiIn<sub>2</sub>SbO<sub>6</sub>). Pearson's R, also known as Pearson correlation coefficient, is a measure of linear correlation between two sets of data. Pearson's R ranged from -1 to 1, representing the negative to a positive correlation. The high absolute Pearson's R-value (close to -1 or 1) implies a strong correlation between the two sets of data while the low absolute Pearson's R-value (close to 0) implies a weak correlation.

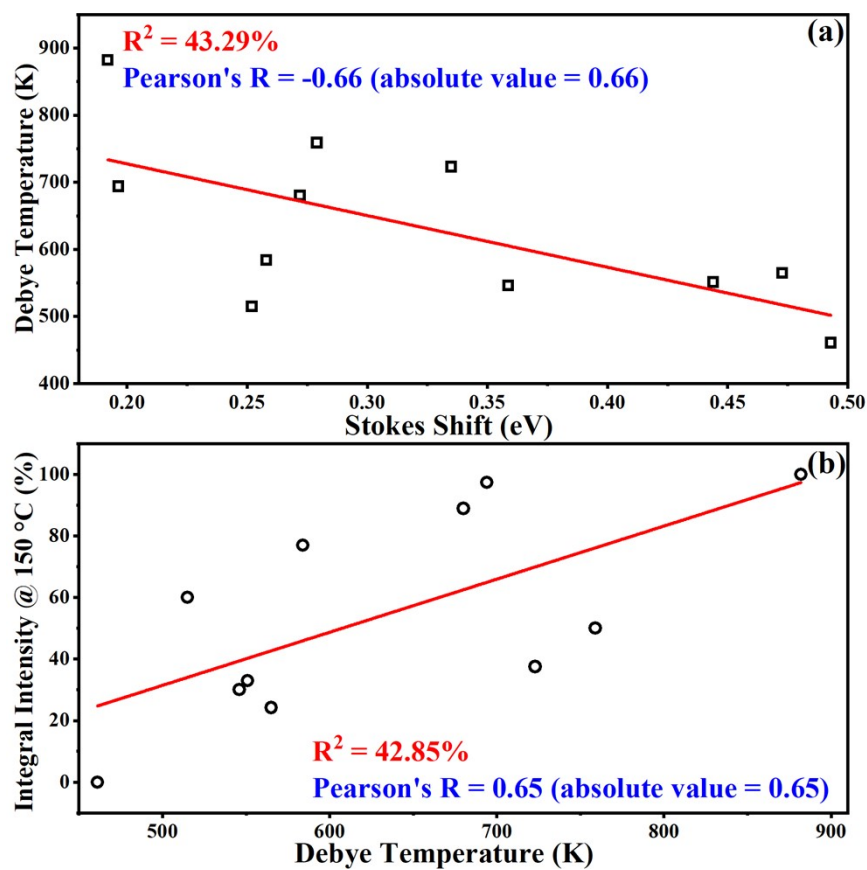

**Figure S2.** Correlation analysis of (a) Stokes shift vs Debye temperature and (b) Debye temperature and thermal stability for Cr<sup>3+</sup>-doped phosphors (SrAl<sub>12</sub>O<sub>19</sub>, Ca<sub>3</sub>Sc<sub>2</sub>Si<sub>3</sub>O<sub>12</sub>, CaMgSi<sub>2</sub>O<sub>6</sub>, KAlP<sub>2</sub>O<sub>7</sub>, GaTaO<sub>4</sub>, ScBO<sub>3</sub>, Mg<sub>2</sub>B<sub>2</sub>O<sub>5</sub>, Mg<sub>2</sub>Ge<sub>2</sub>O<sub>6</sub>, Mg<sub>4</sub>Ta<sub>2</sub>O<sub>9</sub>, LaSc<sub>3</sub>(BO<sub>3</sub>)<sub>4</sub> and LiIn<sub>2</sub>SbO<sub>6</sub>).

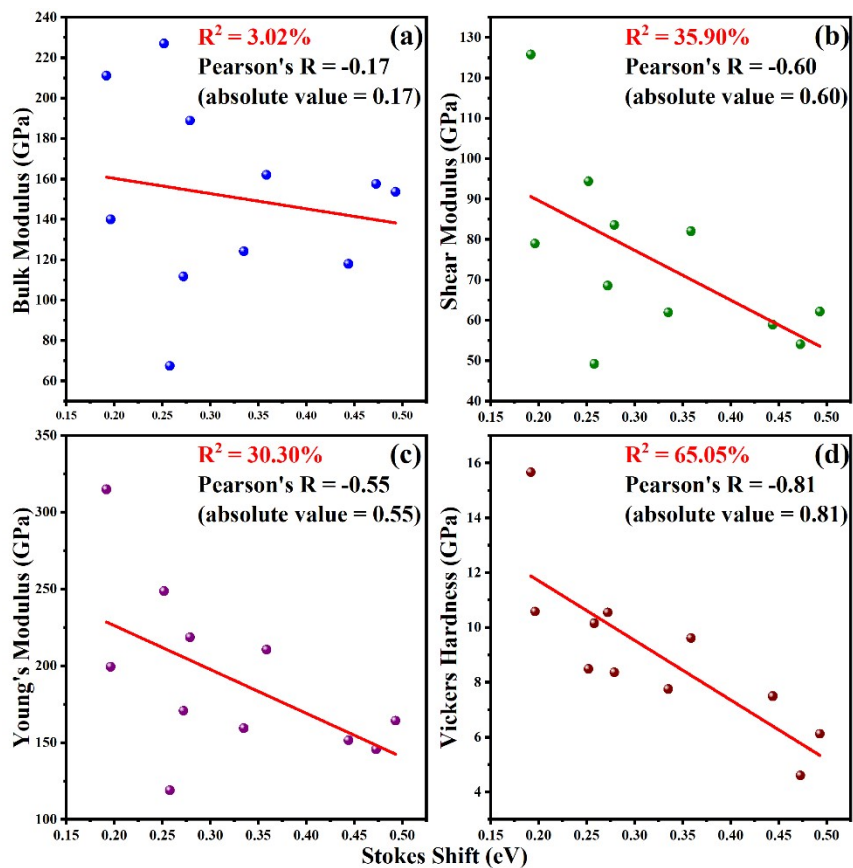

**Figure S3.** Correlation analysis of (a) Stokes vs Bulk modulus, (b) Stokes vs shear modulus, (c) Stokes vs Young's modulus and (d) Stokes vs Vickers hardness for Cr<sup>3+</sup>-doped phosphors (SrAl<sub>12</sub>O<sub>19</sub>, Ca<sub>3</sub>Sc<sub>2</sub>Si<sub>3</sub>O<sub>12</sub>, CaMgSi<sub>2</sub>O<sub>6</sub>, KAlP<sub>2</sub>O<sub>7</sub>, GaTaO<sub>4</sub>, ScBO<sub>3</sub>, Mg<sub>2</sub>B<sub>2</sub>O<sub>5</sub>, Mg<sub>2</sub>Ge<sub>2</sub>O<sub>6</sub>, Mg<sub>4</sub>Ta<sub>2</sub>O<sub>9</sub>, LaSc<sub>3</sub>(BO<sub>3</sub>)<sub>4</sub> and LiIn<sub>2</sub>SbO<sub>6</sub>).

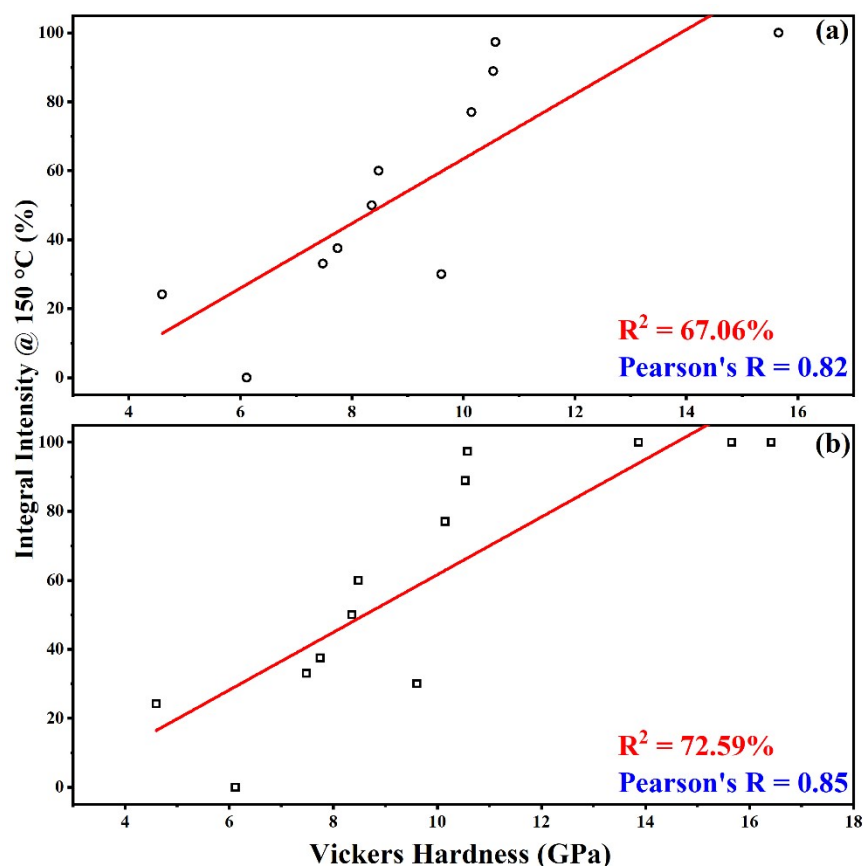

**Figure S4.** Correlation analysis of Vickers hardness vs thermal stabilities of for  $\text{Cr}^{3+}$ -doped phosphors (a)  $\text{SrAl}_{12}\text{O}_{19}$ ,  $\text{Ca}_3\text{Sc}_2\text{Si}_3\text{O}_{12}$ ,  $\text{CaMgSi}_2\text{O}_6$ ,  $\text{KAlP}_2\text{O}_7$ ,  $\text{GaTaO}_4$ ,  $\text{ScBO}_3$ ,  $\text{Mg}_2\text{B}_2\text{O}_5$ ,  $\text{Mg}_2\text{Ge}_2\text{O}_6$ ,  $\text{Mg}_4\text{Ta}_2\text{O}_9$ ,  $\text{LaSc}_3(\text{BO}_3)_4$  and  $\text{LiIn}_2\text{SbO}_6$ , (b)  $\text{Lu}_3\text{Al}_5\text{O}_{12}$ ,  $\text{Y}_3\text{Al}_5\text{O}_{12}$ ,  $\text{SrAl}_{12}\text{O}_{19}$ ,  $\text{Ca}_3\text{Sc}_2\text{Si}_3\text{O}_{12}$ ,  $\text{CaMgSi}_2\text{O}_6$ ,  $\text{KAlP}_2\text{O}_7$ ,  $\text{GaTaO}_4$ ,  $\text{ScBO}_3$ ,  $\text{Mg}_2\text{B}_2\text{O}_5$ ,  $\text{Mg}_2\text{Ge}_2\text{O}_6$ ,  $\text{Mg}_4\text{Ta}_2\text{O}_9$ ,  $\text{LaSc}_3(\text{BO}_3)_4$  and  $\text{LiIn}_2\text{SbO}_6$ .

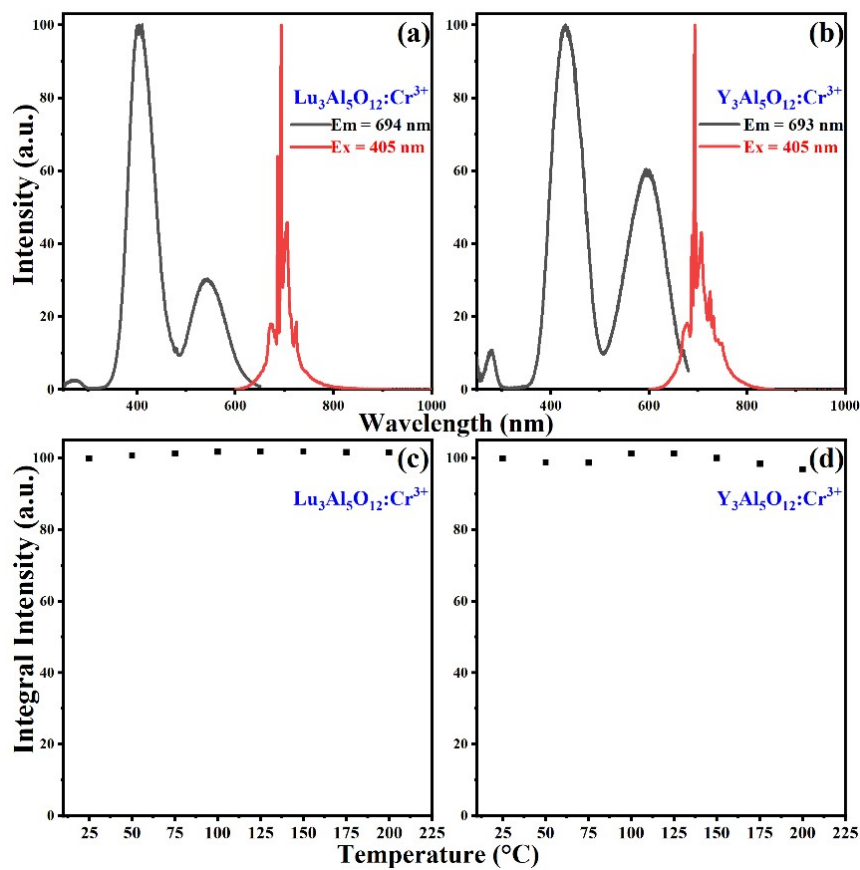

**Figure S5.** (a) PL and PLE spectra of  $\text{Lu}_3\text{Al}_5\text{O}_{12}:\text{Cr}^{3+}$ , (b) PL and PLE spectra of  $\text{Y}_3\text{Al}_5\text{O}_{12}:\text{Cr}^{3+}$ , (c) integral emission intensity of  $\text{Lu}_3\text{Al}_5\text{O}_{12}:\text{Cr}^{3+}$  dependent on temperature, (d) integral emission intensity of  $\text{Y}_3\text{Al}_5\text{O}_{12}:\text{Cr}^{3+}$  dependent on temperature.

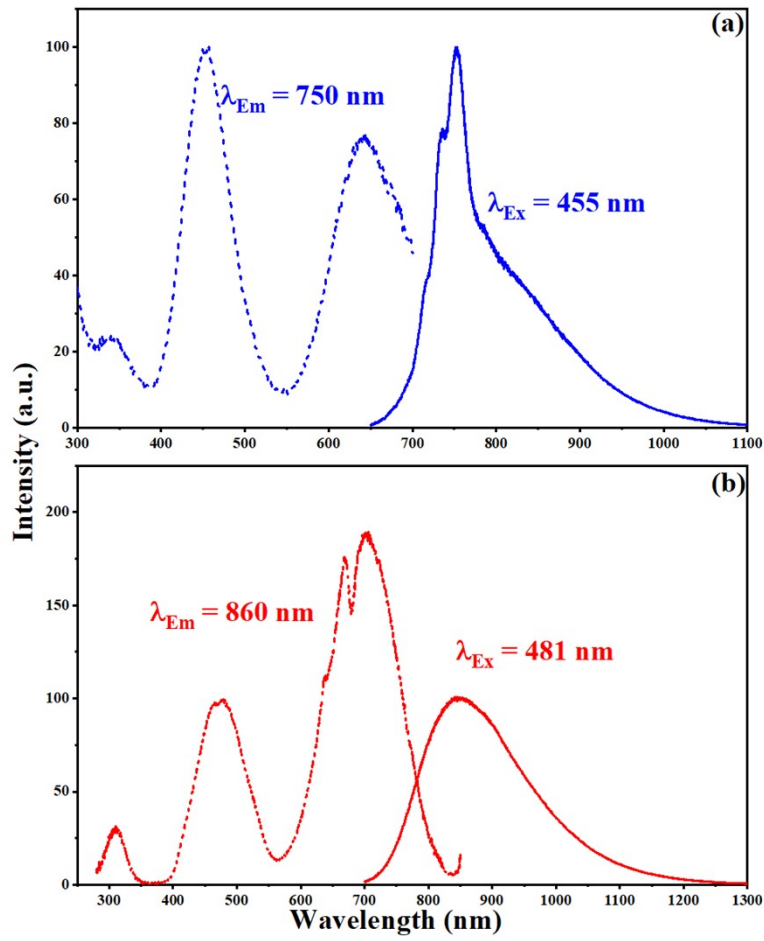

**Figure S6.** PL and PLE spectra of (a) La<sub>2</sub>MgSnO<sub>6</sub>:Cr<sup>3+</sup> and (b) KMg(PO<sub>3</sub>)<sub>3</sub>:Cr<sup>3+</sup>.

**Table S1.** K-points setting of the systems.

| System                                                          | K-point mesh<br>(for PBEsol) | K-point mesh<br>(for HSE06) |
|-----------------------------------------------------------------|------------------------------|-----------------------------|
| Lu <sub>3</sub> Al <sub>5</sub> O <sub>12</sub>                 | 2×2×2                        | -                           |
| Y <sub>3</sub> Al <sub>5</sub> O <sub>12</sub>                  | 2×2×2                        | -                           |
| SrAl <sub>12</sub> O <sub>19</sub>                              | 5×5×1                        | -                           |
| Ca <sub>3</sub> Sc <sub>2</sub> Si <sub>3</sub> O <sub>12</sub> | 2×2×2                        | -                           |
| CaMgSi <sub>2</sub> O <sub>6</sub>                              | 3×3×5                        | -                           |
| KAlP <sub>2</sub> O <sub>7</sub>                                | 4×3×3                        | 1×1×1                       |
| GaTaO <sub>4</sub>                                              | 5×4×5                        | -                           |
| ScBO <sub>3</sub>                                               | 9×9×2                        | -                           |
| Mg <sub>2</sub> B <sub>2</sub> O <sub>5</sub>                   | 4×3×8                        | 2×2×2                       |
| Mg <sub>2</sub> Ge <sub>2</sub> O <sub>6</sub>                  | 1×3×5                        | 1×3×5                       |
| Mg <sub>4</sub> Ta <sub>2</sub> O <sub>9</sub>                  | 9×9×2                        | -                           |
| LaSc <sub>3</sub> (BO <sub>3</sub> ) <sub>4</sub>               | 3×3×2                        | 1×1×1                       |
| LiIn <sub>2</sub> SbO <sub>6</sub>                              | 5×5×3                        | -                           |
| KMg(PO <sub>3</sub> ) <sub>3</sub>                              | 4×4×3                        | 2×2×1                       |
| La <sub>2</sub> MgSnO <sub>6</sub>                              | 6×6×4                        | 3×3×2                       |



**Table S2.** Electron configurations for atoms in the calculations.

| Atom | Configuration                 |
|------|-------------------------------|
| Li   | $2s^1$                        |
| B    | $2s^2 2p^1$                   |
| O    | $2s^2 2p^4$                   |
| Mg   | $3s^2$                        |
| Al   | $3s^2 3p^1$                   |
| Si   | $3s^2 3p^2$                   |
| P    | $3s^2 3p^3$                   |
| K    | $3p^6 4s^1$                   |
| Ca   | $3p^6 4s^2$                   |
| Sc   | $3d^2 4s^1$                   |
| Ga   | $4s^2 4p^1$                   |
| Ge   | $4s^2 4p^2$                   |
| Sr   | $4s^2 4p^6 5s^2$              |
| Y    | $4s^2 4p^6 4d^2 5s^1$         |
| In   | $5s^2 5p^1$                   |
| Sn   | $5s^2 5p^2$                   |
| Sb   | $5s^2 5p^3$                   |
| La   | $5p^6 5d^1 6s^2$              |
| Lu   | $4f^{14} 5s^2 5p^6 5d^1 6s^2$ |
| Ta   | $5d^4 6s^1$                   |

**Table S3.** Cell parameters of  $Y_3Al_5O_{12}$ ,  $Ca_3Sc_2Si_3O_{12}$ ,  $CaMgSi_2O_6$ ,  $GaTaO_4$ ,  $ScBO_3$  and  $LaSc_3(BO_3)_4$  from experimental data (Exp) and calculations by PBE and PBEsol functionals.

|                      |                  | a (Å)   | b (Å)   | c (Å)   | V (Å <sup>3</sup> ) |                     |
|----------------------|------------------|---------|---------|---------|---------------------|---------------------|
| $Y_3Al_5O_{12}$      | Exp <sup>1</sup> | 11.9900 | 11.9900 | 11.9900 | 1723.6835           |                     |
|                      | PBE              | 12.1075 | 12.1075 | 12.1075 | 1774.8581           |                     |
|                      | PBEsol           | 11.9958 | 11.9958 | 11.9958 | 1726.1871           |                     |
|                      | PBE-Error        | +0.98%  | +0.98%  | +0.98%  | +2.97%              |                     |
|                      | PBEsol-Error     | +0.05%  | +0.05%  | +0.05%  | +0.14%              |                     |
|                      |                  | a (Å)   | b (Å)   | c (Å)   | V (Å <sup>3</sup> ) |                     |
| $Ca_3Sc_2Si_3O_{12}$ | Exp <sup>2</sup> | 12.2500 | 12.2500 | 12.2500 | 1838.2656           |                     |
|                      | PBE              | 12.3281 | 12.3281 | 12.3281 | 1873.6430           |                     |
|                      | PBEsol           | 12.2008 | 12.2008 | 12.2008 | 1816.1975           |                     |
|                      | PBE-Error        | +0.64%  | +0.64%  | +0.64%  | +1.92%              |                     |
|                      | PBEsol-Error     | -0.40%  | -0.40%  | -0.40%  | -1.20%              |                     |
|                      |                  | a (Å)   | b (Å)   | c (Å)   | $\beta$ (°)         | V (Å <sup>3</sup> ) |
| $CaMgSi_2O_6$        | Exp <sup>3</sup> | 9.7500  | 8.9260  | 5.2510  | 105.90              | 439.5029            |
|                      | PBE              | 9.8588  | 9.0017  | 5.3080  | 106.06              | 452.6815            |
|                      | PBEsol           | 9.7658  | 8.8985  | 5.2624  | 105.99              | 439.6119            |
|                      | PBE-Error        | +1.12%  | +0.85%  | +1.08%  | +0.15%              | +3.00%              |
|                      | PBEsol-Error     | +0.16%  | -0.31%  | +0.22%  | +0.08%              | +0.02%              |
|                      |                  | a (Å)   | b (Å)   | c (Å)   | $\beta$ (°)         | V (Å <sup>3</sup> ) |
| $GaTaO_4$            | Exp <sup>4</sup> | 4.5879  | 5.5673  | 4.9589  | 90.20               | 126.6606            |
|                      | PBE              | 4.6490  | 5.6495  | 5.0324  | 90.33               | 132.1715            |
|                      | PBEsol           | 4.6093  | 5.5882  | 4.9863  | 90.51               | 128.4324            |
|                      | PBE-Error        | +1.33%  | +1.48%  | +1.48%  | +0.15%              | +4.35%              |
|                      | PBEsol-Error     | +0.47%  | +0.38%  | +0.55%  | +0.35%              | +1.40%              |
|                      |                  | a (Å)   | b (Å)   | c (Å)   | V (Å <sup>3</sup> ) |                     |
| $ScBO_3$             | Exp <sup>5</sup> | 4.7480  | 4.7480  | 15.2620 | 297.9638            |                     |
|                      | PBE              | 4.7816  | 4.7816  | 15.3386 | 303.7162            |                     |
|                      | PBEsol           | 4.7425  | 4.7425  | 15.1669 | 295.4189            |                     |
|                      | PBE-Error        | +0.71%  | +0.71%  | +0.50%  | +1.93%              |                     |
|                      | PBEsol-Error     | -0.12%  | -0.12%  | -0.62%  | -0.85%              |                     |

**Table S4.** Vickers hardness and Debye temperature data of the materials.

| Material                                         | Vickers Hardness (Gpa) | Debye Temperature (K) |
|--------------------------------------------------|------------------------|-----------------------|
| $\text{Lu}_3\text{Al}_5\text{O}_{12}$            | 16.42                  | 675                   |
| $\text{Y}_3\text{Al}_5\text{O}_{12}$             | 13.87                  | 728                   |
| $\text{SrAl}_{12}\text{O}_{19}$                  | 15.66                  | 882                   |
| $\text{Ca}_3\text{Sc}_2\text{Si}_3\text{O}_{12}$ | 10.58                  | 694                   |
| $\text{CaMgSi}_2\text{O}_6$                      | 10.54                  | 680                   |
| $\text{KAlP}_2\text{O}_7$                        | 10.15                  | 584                   |
| $\text{GaTaO}_4$                                 | 8.49                   | 515                   |
| $\text{ScBO}_3$                                  | 8.36                   | 759                   |
| $\text{Mg}_2\text{B}_2\text{O}_5$                | 7.75                   | 723                   |
| $\text{Mg}_2\text{Ge}_2\text{O}_6$               | 7.49                   | 551                   |
| $\text{Mg}_4\text{Ta}_2\text{O}_9$               | 9.61                   | 546                   |
| $\text{LaSc}_3(\text{BO}_3)_4$                   | 4.60                   | 565                   |
| $\text{LiIn}_2\text{SbO}_6$                      | 6.11                   | 461                   |

**Table S5.** Elastic parameters and band gap values of  $\text{La}_2\text{MgSnO}_6$  and  $\text{KMg}(\text{PO}_3)_3$ .

| Material                    | Bulk modulus<br>(GPa) | Shear modulus<br>(GPa) | Young modulus<br>(GPa) | Poisson<br>ratio | Vickers<br>hardness (Gpa) | Debye<br>Temp (K) | Band Gap<br>(eV) |
|-----------------------------|-----------------------|------------------------|------------------------|------------------|---------------------------|-------------------|------------------|
| $\text{La}_2\text{MgSnO}_6$ | 149.996               | 77.332                 | 197.973                | 0.28             | 9.410                     | 480.83            | 5.77             |
| $\text{KMg}(\text{PO}_3)_3$ | 59.494                | 38.574                 | 95.157                 | 0.23             | 7.463                     | 529.58            | 6.62             |

## References:

1. Ł. Dobrzycki, E. Bulska, D. A. Pawlak, Z. Frukacz and K. Woźniak, *Inorg. Chem.*, 2004, **43**, 7656-7664.
2. R. Oberti, S. Quartieri, M. C. Dalconi, F. Boscherini, G. Iezzi, M. Boiocchi and S. G. Eeckhout, *Am. Mineral.*, 2006, **91**, 1230-1239.
3. E. Bruno, S. Carbonin and G. Molin, *Tschermaks mineralogische und petrographische Mitteilungen*, 1982, **29**, 223-240.
4. L. Perfler, V. Kahlenberg, D. Többens, A. Schaur, M. Tribus, M. Orlova and R. Kaindl, *Inorg. Chem.*, 2016, **55**, 5384-5397.
5. D. A. Keszler and H. Sun, *Acta Crystallogr. C*, 1988, **44**, 1505-1507.
